# Supplementary material for: Polμ Deficiency Increases Resistance to Oxidative Damage and Delays Liver Aging
Source: PubMed Central journal article supplement (PMC3972199; doi:10.1371/journal.pone.0093074), 2014-04-01
Supplement: pone.0093074.s006.pdf [file pone.0093074.s006.pdf]

| GO term                                                          | p value   |
|------------------------------------------------------------------|-----------|
| <b>Biological processes upregulated in Polμ<sup>-/-</sup></b>    |           |
| porphyrin metabolism                                             | 0,0000000 |
| heme metabolism                                                  | 0,0000000 |
| pigment metabolism                                               | 0,0007000 |
| glutamine family amino acid catabolism                           | 0,0007000 |
| amino acid metabolism                                            | 0,0015000 |
| cellular physiological process                                   | 0,0015000 |
| secondary metabolism                                             | 0,0016000 |
| amino acid catabolism                                            | 0,0035000 |
| lipoprotein metabolism                                           | 0,0039000 |
| regulation of cholesterol absorption                             | 0,0045000 |
| arginine catabolism                                              | 0,0045000 |
| heparan sulfate proteoglycan biosynthesis                        | 0,0045000 |
| amino acid and derivative metabolism                             | 0,0049000 |
| cellular protein metabolism                                      | 0,0060000 |
| tRNA aminoacylation for protein translation                      | 0,0068000 |
| tRNA aminoacylation                                              | 0,0068000 |
| amino acid activation                                            | 0,0068000 |
| cholesterol absorption                                           | 0,0074000 |
| lipid digestion                                                  | 0,0074000 |
| negative regulation of axon extension                            | 0,0074000 |
| negative regulation of axonogenesis                              | 0,0074000 |
| heparan sulfate proteoglycan metabolism                          | 0,0074000 |
| amine metabolism                                                 | 0,0079000 |
| amine catabolism                                                 | 0,0082000 |
| nitrogen compound catabolism                                     | 0,0082000 |
| cellular macromolecule metabolism                                | 0,0088000 |
| <b>Biological processes downregulated in Polμ<sup>-/-</sup></b>  |           |
| antigen presentation                                             | 0,0002000 |
| antigen presentation, endogenous antigen                         | 0,0003000 |
| lipid metabolism                                                 | 0,0006000 |
| antigen presentation, peptide antigen                            | 0,0008000 |
| renin-angiotensin regulation of aldosterone production           | 0,0012000 |
| angiotensin mediated regulation of renal output                  | 0,0012000 |
| renal response to blood flow during renin-angiotensin regulation | 0,0012000 |
| electron transport                                               |           |
| steroid metabolism                                               | 0,0012000 |
| generation of precursor metabolites and energy                   | 0,0019000 |
| antigen processing                                               | 0,0023000 |
| Golgi vesicle transport                                          | 0,0026000 |
| renin-angiotensin regulation of body fluid levels                | 0,0033000 |
| cellular lipid metabolism                                        | 0,0036000 |
| antigen processing, endogenous antigen via MHC class I           | 0,0037000 |
| regulation of body fluids                                        | 0,0043000 |
| localization                                                     | 0,0044000 |
| establishment of localization                                    | 0,0065000 |
| brain renin-angiotensin system                                   | 0,0068000 |
| renal blood volume regulation of blood pressure                  | 0,0071000 |
| antigen presentation, exogenous antigen via MHC class II         | 0,0071000 |
| reproductive organismal physiological process                    | 0,0075000 |
| reproductive physiological process                               | 0,0094000 |
| antigen presentation                                             | 0,0094000 |

Table S1
