# Supplementary material for: Polμ Deficiency Increases Resistance to Oxidative Damage and Delays Liver Aging
Source: PubMed Central journal article supplement (PMC3972199; doi:10.1371/journal.pone.0093074), 2014-04-01
Supplement: pone.0093074.s007.pdf [file pone.0093074.s007.pdf]

## TABLE Supplemental Experimental Procedures

|                                                                                        |                                                         |
|----------------------------------------------------------------------------------------|---------------------------------------------------------|
| Bid ( <i>BCL-2 Interacting Domain</i> )                                                | Mm00432073_ml                                           |
| P21                                                                                    | Mm00432448_ml                                           |
| Perp                                                                                   | Mm00480750_ml                                           |
| Acin1 ( <i>Acinus; Apoptotic Chromatin Condensator</i> )                               | Mm00479895_ml                                           |
| Egln3 ( <i>or PDH3, Prolyl-Hydroxylase Domain protein 3</i> )                          | Mm00472200_ml                                           |
| Ddit4l/ REDD2 ( <i>DNA-Damage-Inducible Transcript 4-like DNA Damage Response 2</i> ). | Mm00513313_ml                                           |
| Pah                                                                                    | 5' CGGCTCCATAGCTGAGAATC 3'<br>5'TCCCGAGACAAGGAAAAGAA 3' |
| Knck1                                                                                  | 5' CTTTGCCCCCATCTGACA 3'<br>5' TGGAAATTGGGACTTCACCTC 3' |
| CD209d                                                                                 | 5' GTCTGAGAGACCCATCCAGG3'<br>5' GGCCCAACTGGTCATCATAG3'  |
| Casq1                                                                                  | 5' CTCATCAGCAGAAGGCAGGT3'<br>5' TTGACCTGTCAGCTCCACAA3'  |
| Ddc                                                                                    | 5' GGATGTGGTCCCCAGTGTAG3'<br>5' CATGAGAGCTTCTGCCCTTC3'  |
| eMID2                                                                                  | 5' GCTAAGCCGGGTACAGTTCA3'<br>5' CGACCTACCGGGTTTCCTAC3'  |
| TRAM                                                                                   | 5' GACAGGCAGTTCTCAGAGGC3'<br>5' AAACAAACTGAATGAGGCCG3'  |
| ATG51                                                                                  | 5' ACAGCTTCTGGATGAAAGGC3'<br>5' TGGGACTGCAGAATGACAGA3'  |
| ATG71                                                                                  | 5' GCCAGGTACTCCTGAGCTGT3'<br>5' GGTCTTACCCTGCTCCATCA3'  |
| ATG121                                                                                 | 5' CCACAGCCCATTTCTTTGTT3'<br>5' GTCCTCGGCTGCAGTTTC3'    |
| Map11c3b                                                                               | 5' GCTGCTTCTCCCCCTTGTAT 3'<br>5' CCGAGAAGACCTTCAAGCAG3' |
| $\beta$ -actin                                                                         | 5' GGGGTGTTGAAGGTCTCAA3'<br>5' AGAAAATCTGGCACCCC3'      |
